# Supplementary material for: Adhesion GPCR GPR56 Expression Profiling in Human Tissues
Source: MDPI journal article supplement (doi:10.3390/cells10123557), 2021-12-16
Supplement: s1 [file s1]

# **Adhesion GPCR GPR56 expression profiling in human tissues**

**Fyn Kaiser <sup>1\*</sup>, Markus Morawski <sup>2</sup>, Knut Krohn <sup>3</sup>, Nada Rayes <sup>1</sup>, Cheng-Chih Hsiao <sup>4</sup>, Marianne Quaas <sup>1</sup>, Gabriela Aust <sup>1</sup>**

<sup>1</sup> Research Laboratories and Clinic of Visceral, Transplantation, Thoracic, and Vascular Surgery, Leipzig University, and University Hospital Leipzig; fyn.kaiser@medizin.uni-leipzig.de, nada.rayes@medizin.uni-leipzig.de, marianne.quaas@medizin.uni-leipzig.de, gabriela.aust@medizin.uni-leipzig.de

<sup>2</sup> Paul Flechsig Institute of Brain Research, Leipzig University; markus.morawski@medizin.uni-leipzig.de

<sup>2</sup> Core Unit DNA-Technologies, Leipzig University, Leipzig, Germany; knut.krohn@medizin.uni-leipzig.de

<sup>2</sup> Department of Experimental Immunology, Amsterdam Infection and Immunity Institute, Amsterdam UMC, Amsterdam, Netherlands; c.hsiao@amsterdamumc.nl

\* Correspondence: fyn.kaiser@medizin.uni-leipzig.de; Tel.: 0049 341 97 17555

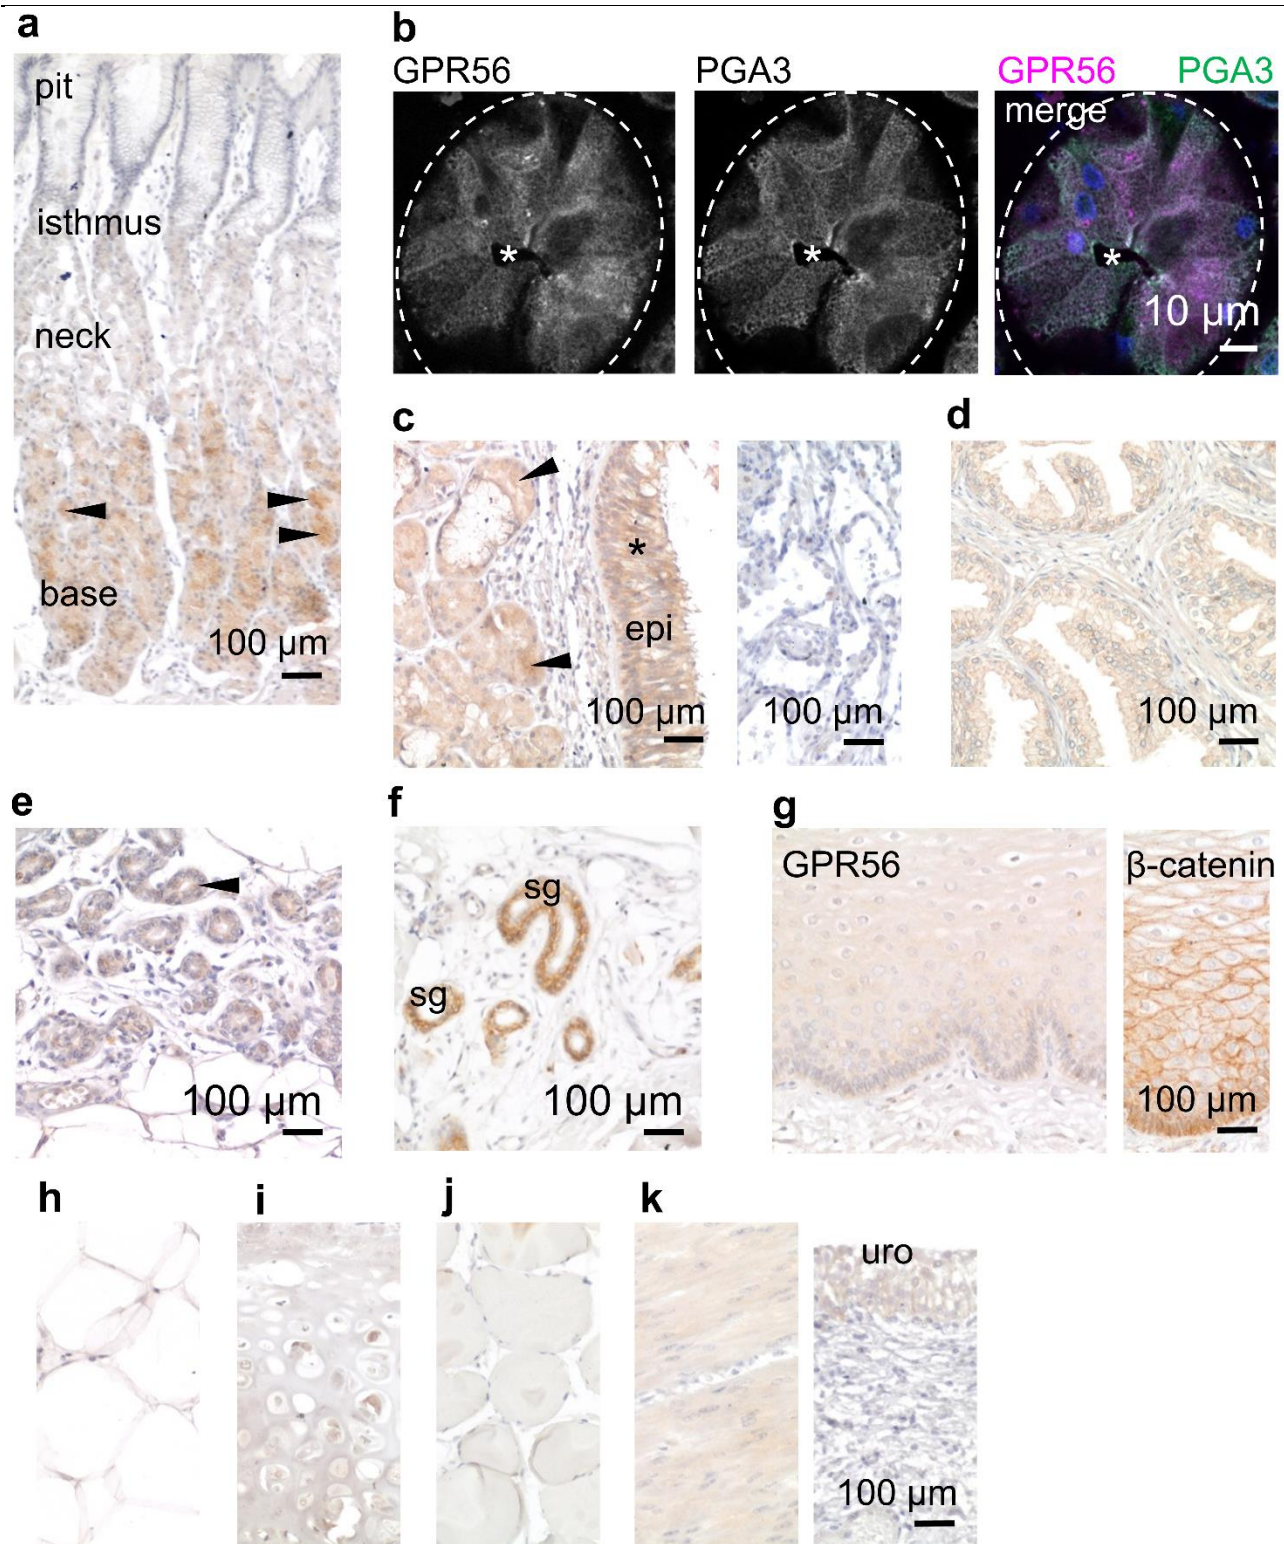

**Figure S1 Secreting epithelia express GPR56**

**(a-k)** Immunostained human paraffin sections using the GPR56<sup>N<sup>TF4</sup></sup> Ab. **(a)** In a longitudinal section through the gastric epithelium (corpus region), cells at the gland base express GPR56 (arrowheads). **(b)** GPR56 and pepsinogen A (PGA3) co-localize in chief cells at the gastric gland base (cross section; asterisk: gland lumen), double-immunofluorescence. **(c)** In the lung, the pseudostratified epithelium (asterisk) of an intrapulmonary bronchus and the serous parts of bronchial glands (arrowheads) express GPR56 (left), whereas the alveolar epithelium and thus alveolar type 1 (AT1) and 2 (AT2) cells were GPR56-negative (right). **(d-f)** Epithelial cells in the prostate **(d)**, the adult mammary gland **(e)**, arrowhead: non-lactating acini), and the sweat glands (sg) of the skin **(f)** are GPR56-positive. **(g)** In the esophagus, basal and the following suprabasal

---

epithelial cells are hardly GPR56-positive (left GPR56, right  $\beta$ -catenin/*CTNNB1*) (**h-k**) Connective tissue as white fat (**h**) and hyaline cartilage (**i**, trachea), as well as skeletal (**j**, cross section) and smooth muscle (**k**, urinary bladder; left smooth muscle, right urothelium) do not or only slightly express GPR56.

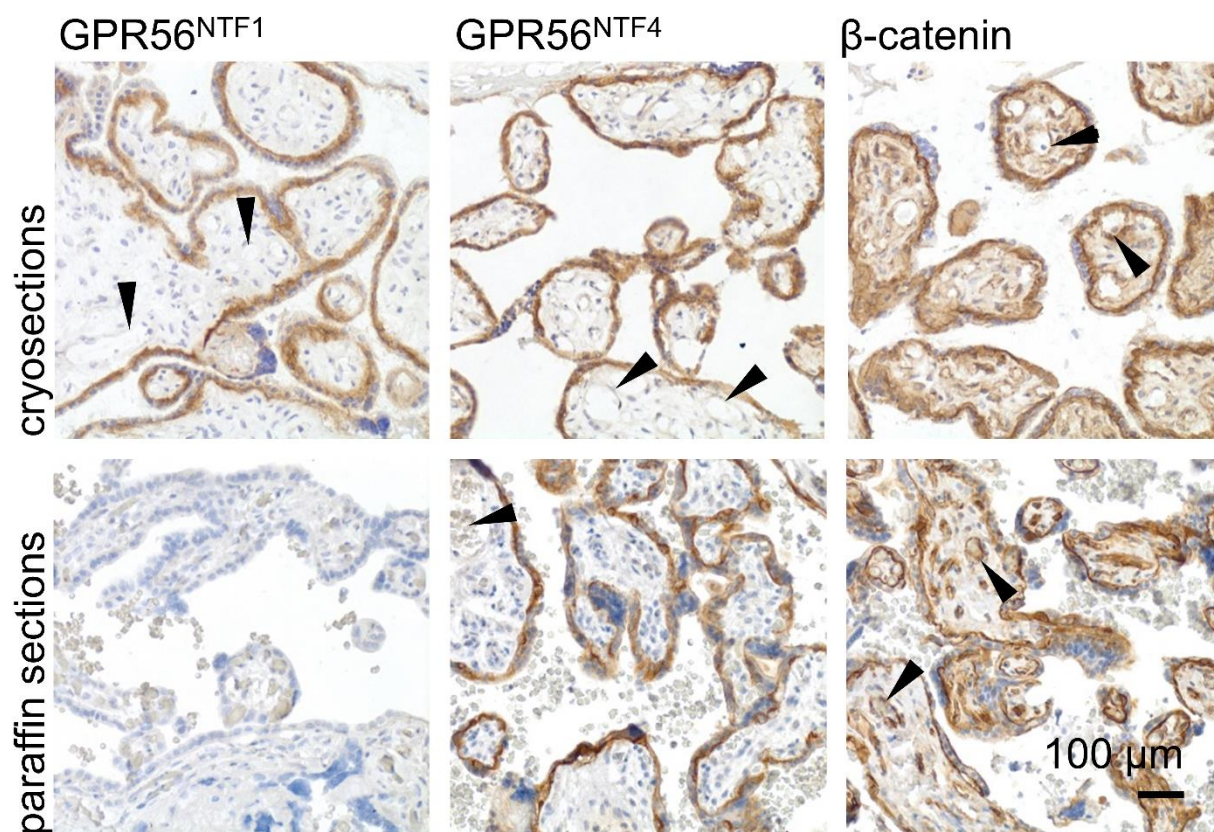

**Figure S2 The GPR56<sup>NTF4</sup> Ab stained cryo- and paraffin sections comparably.**

Sections of a full-term placenta were stained with the GPR56<sup>NTF1</sup> and GPR56<sup>NTF4</sup> Abs. GPR56 localized in the syncytiotrophoblast, but not, as  $\beta$ -catenin/*CTNNB1* (right, positive control), in the endothelium (arrows).

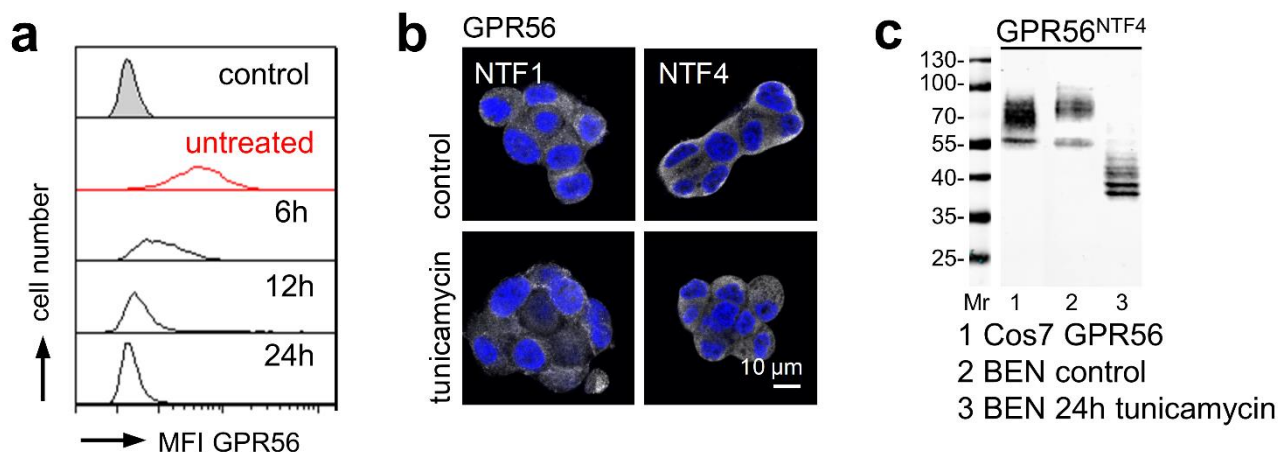

**Figure S3 GPR56 cell surface expression depends on N-glycosylation.**

(a-c) Tunicamycin, which prevents N-glycosylation, decreased cell surface but not intracellular GPR56. Loss of surface GPR56 was paralleled by a decrease of the GPR56 molecular weight. **(a)** BEN cells, treated with tunicamycin for the indicated times, were stained with the GPR56<sup>NTF1</sup> Ab and analyzed by flow cytometry; MFI (mean fluorescence intensity). **(b)** Monolayered BEN cells, treated with tunicamycin for 24 h, were stained for GPR56. **(c)** Western blot analysis of GPR56 COS-7 cells and BEN control and tunicamycin-treated cells using the GPR56<sup>NTF4</sup> Ab. The various bands seen after tunicamycin treatment (line 3) are likely to represent *ADGRG1* splice variants.

**Tab. S1. Antibodies (Abs) and reagents for immunolabeling**

| Ab/reagent                                | Antigen/binding to                                      | source,<br>mono/poly<br>clonal  | clone  | Used for                                     | reference/<br>company; catalog number                              |
|-------------------------------------------|---------------------------------------------------------|---------------------------------|--------|----------------------------------------------|--------------------------------------------------------------------|
| GPR56 <sup>NTF1</sup> Ab                  | GPR56 nearby N-terminus                                 | m, mono                         | CG-4   | GPR56 Ab screening                           | [3]                                                                |
| GPR56 <sup>NTF2</sup> Ab                  | GPR56, competes GPR56 <sup>NTF1</sup> <i>vice versa</i> | h, mono                         | REA467 | GPR56 Ab screening                           | Miltenyi Biotech, Bergisch-Gladbach, Germany; 130-106-979          |
| GPR56 <sup>NTF3</sup> Ab                  | GPR56, H252-Y265*                                       | r, poly                         |        | GPR56 Ab screening                           | Thermo Fisher Scientific, Darmstadt, Germany; 720373               |
| GPR56 <sup>NTF4</sup> Ab #                | GPR56, L289-H381*, GAIN                                 | m, mono                         | G-6    | GPR56 Ab screening                           | Santa Cruz Biotechnology, Heidelberg, Germany; sc-390192           |
| GPR56 <sup>CTF</sup> Ab                   | GPR56, C-terminus                                       | r, poly                         |        | GPR56 Ab screening                           | Merck, Darmstadt, Germany; ABS1028                                 |
| $\beta$ -catenin Ab                       |                                                         | m, mono                         | C-14   | Comparison to GPR56 in tissues               | BD Biosciences, Heidelberg, Germany; 610153                        |
| $\beta$ -actin Ab                         |                                                         | m, mono                         | AC-15  | Loading control Western blotting             | Merck; A5441                                                       |
| myc-Tag Ab                                |                                                         | m, mono                         | 9B11   | Coimmunolabeling using tagged GPR56          | Cell Signaling Tech., Danvers, US; 2276                            |
| myc-Tag Ab                                |                                                         | r, mono                         | 71D10  | Coimmunolabeling using tagged GPR56          | Cell Signaling Tech; 2278                                          |
| Insulin                                   |                                                         | gp, p                           |        | Coimmunolabeling with pancreas               | Dako Agilent, Santa Clara, CA, US; #A0564                          |
| Pepsinogen A1                             |                                                         | r, poly                         |        | Coimmunolabeling with stomach                | Thermo Fisher; PA561360                                            |
| IBA-1 Ab                                  |                                                         | r, poly                         |        | Coimmunolabeling with brain                  | FUJIFILM Wako Chemicals, Richmond, USA; 019-19741                  |
| Alexa Fluor488 anti-rabbit IgG            | anti-rabbit                                             | g, F(ab') <sub>2</sub> fragment |        | Secondary Ab fluorophor-based immunolabeling | Jackson ImmunoResearch Europe Ltd, Cambridgeshire, UK; 111-546-144 |
| Alexa Fluor546 anti-mouse IgG             | anti-mouse                                              | g, F(ab') <sub>2</sub> fragment |        | Secondary Ab fluorophor-based immunolabeling | Thermo Fisher; A-11018                                             |
| <i>Lotus tetragonolobus</i> lectin (LTL), | $\alpha$ -linked L-fucose containing oligosaccharides   |                                 |        | Colabeling kidney                            | Vector Laboratories, Burlingame, California, USA; FL-1321          |

|                                                                 |                       |                 |  |                            |                                                |
|-----------------------------------------------------------------|-----------------------|-----------------|--|----------------------------|------------------------------------------------|
| fluorescein-labelled                                            |                       |                 |  |                            |                                                |
| <i>Dolichos biflorus</i> agglutinin (DBA), fluorescein-labelled | N-Acetylgalactosamine |                 |  | Colabeling kidney          | Vector Laboratories; FL-1031                   |
| ImmPress HRP                                                    | anti-mouse            | ho, polymer IgG |  | HRP-based immunolabeling   | Vector Laboratories; MP-7402                   |
| SIGMAFAST™ DAB tablets                                          |                       |                 |  | colorimetric detection HRP | Merck; D4418                                   |
| TrueBlack®                                                      |                       |                 |  | auto fluorescence quencher | Biotium Inc., Fremont, California, USA; #23007 |

\* NP\_001139243.1; d donkey, g goat, gp guinea pig, h human, ho horse, m mouse, r rabbit; # GPR56<sup>NTF4</sup> Ab quality varied obviously between various batches; however, the company did not improve Ab quality until now.

**Tab. S2 GPR56 Abs validation**

| method           | cells/tissues                 | GPR56 Ab              |                       |                       |                      |
|------------------|-------------------------------|-----------------------|-----------------------|-----------------------|----------------------|
|                  |                               | GPR56 <sup>NTF1</sup> | GPR56 <sup>NTF3</sup> | GPR56 <sup>NTF4</sup> | GPR56 <sup>CTF</sup> |
| IS               | GPR56 COS-7                   | specific              | specific #            | specific              | specific             |
| IS-P             | GPR56 COS-7                   | -                     | specific #            | specific              | specific             |
| IS*              | BEN, GPR56KO                  | specific              | -                     | specific              | -                    |
| IS-P             | BEN, GPR56KO                  | -                     | -                     | specific              | -                    |
| IH**-cryosection | thyroid                       | specific              | -                     | specific              | -                    |
| IH-P             | thyroid                       | -                     | specific #            | specific              | -                    |
| FC               | GPR56 COS-7;<br>BEN, GPR56KO  | specific              | -                     | -                     | -                    |
| FC*              | GPR56 COS-7;<br>BEN, GPR56KO  | specific              | -                     | specific              | -                    |
| Western Blot     | hGPR56 COS-7;<br>BEN, GPR56KO | -                     | specific              | specific              | -                    |

FC flow cytometry, IH immunohistology, IS immunostaining of cells; P paraffin-embedded; \*paraformaldehyde-fixed; \*\*acetone-fixed; - negative, not suitable, or not clear without ambiguity; # GPR56<sup>NTF3</sup> stains nuclei of all (also non-transfected) COS-7 cells. This is likely unspecific; nuclear localization sequence prediction using cNLS Mapper resulted in low scores (2-3) for GPR56.

**Tab. S3 GPR56 human expression profile (without nervous system)**

| <b>Organ System - Cell Type</b>                                            | <b>GPR56<sup>NTF4</sup> Ab staining intensity, pattern</b> |
|----------------------------------------------------------------------------|------------------------------------------------------------|
| <b>hematopoietic</b>                                                       |                                                            |
| Spleen - lymphocytes                                                       | few cells mantle zone +++, membranous                      |
| <b>Cardiovascular</b>                                                      |                                                            |
| Heart myocytes                                                             | - / ±                                                      |
| Vasculature - endothelial cells, smooth muscle cells, pericytes            | -                                                          |
| <b>Respiratory system</b>                                                  |                                                            |
| Lung – bronchus- epithelial cells                                          | +                                                          |
| Lung - glandulae bronchiales                                               | + serous parts, cell contacts                              |
| Lung - alveolar cells                                                      | -                                                          |
| <b>Digestive system</b>                                                    |                                                            |
| Esophagus- epithelium                                                      | ± , cell contacts                                          |
| Stomach - epithelium- mucous (neck) cells, parietal, enteroendocrine cells | - / ±                                                      |
| Stomach - epithelium - chief cells                                         | ++, intracellular                                          |
| Small intestine, colon - epithelium                                        | - / ±                                                      |
| Liver - hepatocytes                                                        | -                                                          |
| Pancreas - exocrine, interlobular duct epithelial cells                    | ± / +                                                      |
| <b>Urinary system</b>                                                      |                                                            |
| Kidney – tubules - proximal, distal                                        | +++, +++, cell contacts                                    |
| Urinary bladder - urothelium                                               | ±                                                          |
| Urinary bladder - smooth muscle                                            | - / ±                                                      |
| <b>Endocrine System</b>                                                    |                                                            |
| Thyroid - thyrocytes                                                       | ++/+++, mainly intracellular                               |
| Thyroid - C cells                                                          | -                                                          |
| Pancreas - endocrine cells (islets of Langerhans)                          | +++ only β-cells, intracellular                            |
| Intestine- enteroendocrine cells                                           | -                                                          |
| <b>Reproductive system</b>                                                 |                                                            |
| Prostate - epithelial cells                                                | +                                                          |
| Placenta - syncytiotrophoblast                                             | +++, cell contacts, intracellular                          |
| <b>Skin</b>                                                                |                                                            |
| Skin – epidermis - keratinocytes                                           | ± basal, most suprabasal layers                            |
| Skin - sweat and sebaceous glands (epithelial cells)                       | ++, cell contacts                                          |

|                                           |       |
|-------------------------------------------|-------|
| Breast - mammary gland epithelial cells   | ± /+  |
| <b>Musculoskeletal, connective tissue</b> |       |
| Adipocytes                                | -     |
| Fibroblasts                               | -     |
| Cartilage - chondrocytes                  | -     |
| Skeletal muscle – myocytes                | - / ± |

immunohistology, paraffin-embedded (IH-P);

–, ± /+ , ++ and +++ indicate no, slight, moderate, and strong staining, respectively

**Tab. S4 GPR56 in thyroid cancer**

|   | type                  | tumor center |           |            | tumor invasion front |           | normal tissue* |           |
|---|-----------------------|--------------|-----------|------------|----------------------|-----------|----------------|-----------|
|   |                       | localization | intensity | GPR56+ (%) | localization         | intensity | localization   | intensity |
| 1 | papillary             | m, c         | ++/+++    | 100        | c                    | +/++      | c              | +/++      |
| 2 | papillary             | m, c         | +         | 100        |                      |           | c              | +         |
| 3 | papillary             | m, c         | ++/+++    | 100        |                      |           | c              | +/++      |
| 4 | papillary             | c (m)        | + - +++   | 100        |                      |           | c              | +/++      |
| 5 | papillary             | m, c         | ++/+++    | 100        | c                    | +         | c              | +/++      |
| 6 | papillary             | c (m)        | + - +++   | 100        | c                    | +/++      | c              | +         |
| 7 | follicular            | c            | +/++      | 90         | c                    | ++        | c              | +/++      |
| 8 | poorly differentiated | c            | ±         | 90         |                      |           |                |           |
| 9 | anaplastic            | -            | -         | -          |                      |           |                |           |

IH-P immunohistology, paraffin-embedded;

-, ± /+, ++ and +++ indicate no, slight, moderate, and strong staining, respectively;

c cytoplasmatic, m membranous; \* if present in the same section
